# Supplementary material for: Soybean vs. Pea Bean in the Diet of Medium-Growing Broiler Chickens Raised under Semi-Intensive Conditions of Inner Mediterranean Areas: Growth Performance and Environmental Impact
Source: MDPI journal article supplement (doi:10.3390/ani12050649), 2022-03-03
Supplement: s1 [file s1]

## Supplementary Material

**Table S1.** Raw materials price average values ( $\pm$  SD) and calculated feeding costs for each experimental treatment for the last trimester of 2019, 2020, and 2021.

| Feed ingredients                 | Price <sup>a</sup> (€/t) | Diet cost<br>(€/100 kg as fed) |        | Diet cost<br>(€/kg DM) |        |
|----------------------------------|--------------------------|--------------------------------|--------|------------------------|--------|
|                                  |                          | SOY                            | PEA    | SOY                    | PEA    |
| <b>2019</b>                      |                          |                                |        |                        |        |
| Wheat bran                       | 161.6 (± 13.5)           | 8.42                           | 8.08   | 0.08                   | 0.08   |
| Durum Wheat                      | 266.7 (± 8.31)           | 6.40                           | 6.67   | 0.07                   | 0.07   |
| Corn meal                        | 174.8 (± 0.39)           | 2.56                           | 2.18   | 0.03                   | 0.02   |
| Faba bean                        | 278.6 (± 1.92)           | 1.74                           | 1.74   | 0.02                   | 0.2    |
| Pea bean                         | 234.4 (± 8.41)           | -                              | 1.46   | -                      | 0.2    |
| Soybean flaked, 37 % CP          | 367.5 (± 3.78)           | 1.10                           | -      | 0.01                   | -      |
| <b>Total cost</b>                |                          | 20.22                          | 20.14  | 0.21                   | 0.20   |
| <b>Variation <sup>b</sup>, %</b> |                          |                                | - 0.40 |                        | - 5.00 |
| <b>2020</b>                      |                          |                                |        |                        |        |
| Wheat bran                       | 197.9 (± 18.5)           | 10.31                          | 9.89   | 0.10                   | 0.09   |
| Durum Wheat                      | 297.8 (± 7.97)           | 7.15                           | 7.45   | 0.08                   | 0.08   |
| Corn meal                        | 195.3 (± 5.82)           | 2.86                           | 2.44   | 0.03                   | 0.03   |
| Faba bean                        | 289.0 (± 3.77)           | 1.81                           | 1.81   | 0.02                   | 0.02   |
| Pea bean                         | 250.7 (± 13.9)           | -                              | 1.57   | -                      | 0.02   |
| Soybean flaked, 37 % CP          | 433.9 (± 20.1)           | 1.30                           | -      | 0.02                   | -      |
| <b>Total cost</b>                |                          | 23.43                          | 23.16  | 0.24                   | 0.23   |
| <b>Variation <sup>b</sup>, %</b> |                          |                                | - 1.17 |                        | - 4.35 |
| <b>2021</b>                      |                          |                                |        |                        |        |
| Wheat bran                       | 214.6 (± 22.9)           | 11.18                          | 10.73  | 0.11                   | 0.10   |
| Durum Wheat                      | 542.3 (± 6.93)           | 13.01                          | 13.56  | 0.14                   | 0.14   |
| Corn meal                        | 295.1 (± 5.94)           | 4.32                           | 3.69   | 0.05                   | 0.04   |
| Faba bean                        | 377.0 (± 16.9)           | 2.36                           | 2.36   | 0.03                   | 0.03   |
| Pea bean                         | 320.5 (± 0.00)           | -                              | 2.00   | -                      | 0.02   |
| Soybean flaked, 37 % CP          | 528.1 (± 14.8)           | 1.58                           | -      | 0.02                   | -      |
| <b>Total cost</b>                |                          | 32.46                          | 32.34  | 0.332                  | 0.329  |
| <b>Variation <sup>b</sup>, %</b> |                          |                                | - 0.37 |                        | - 0.91 |

<sup>a</sup> Based on the average price of the last trimester of 2019, 2020, and 2021 from Bologna Exchange Commodity [3].

<sup>b</sup> Variation = ((PEA-SOY)/PEA) \* 100.

DM = dry matter; CP = crude protein.
